# Supplementary material for: Nutritional and metabolic control of germ cell fate through O‐GlcNAc regulation
Source: PubMed Central journal article supplement — EMBO Rep. 2023 Oct 16;24(11):e56845. doi: 10.15252/embr.202356845 (PMC10626443; doi:10.15252/embr.202356845), 2023-10-16
Supplement: EMBR-24-e56845-s013.pdf [file EMBR-24-e56845-s013.pdf]

# Expanded View Figures

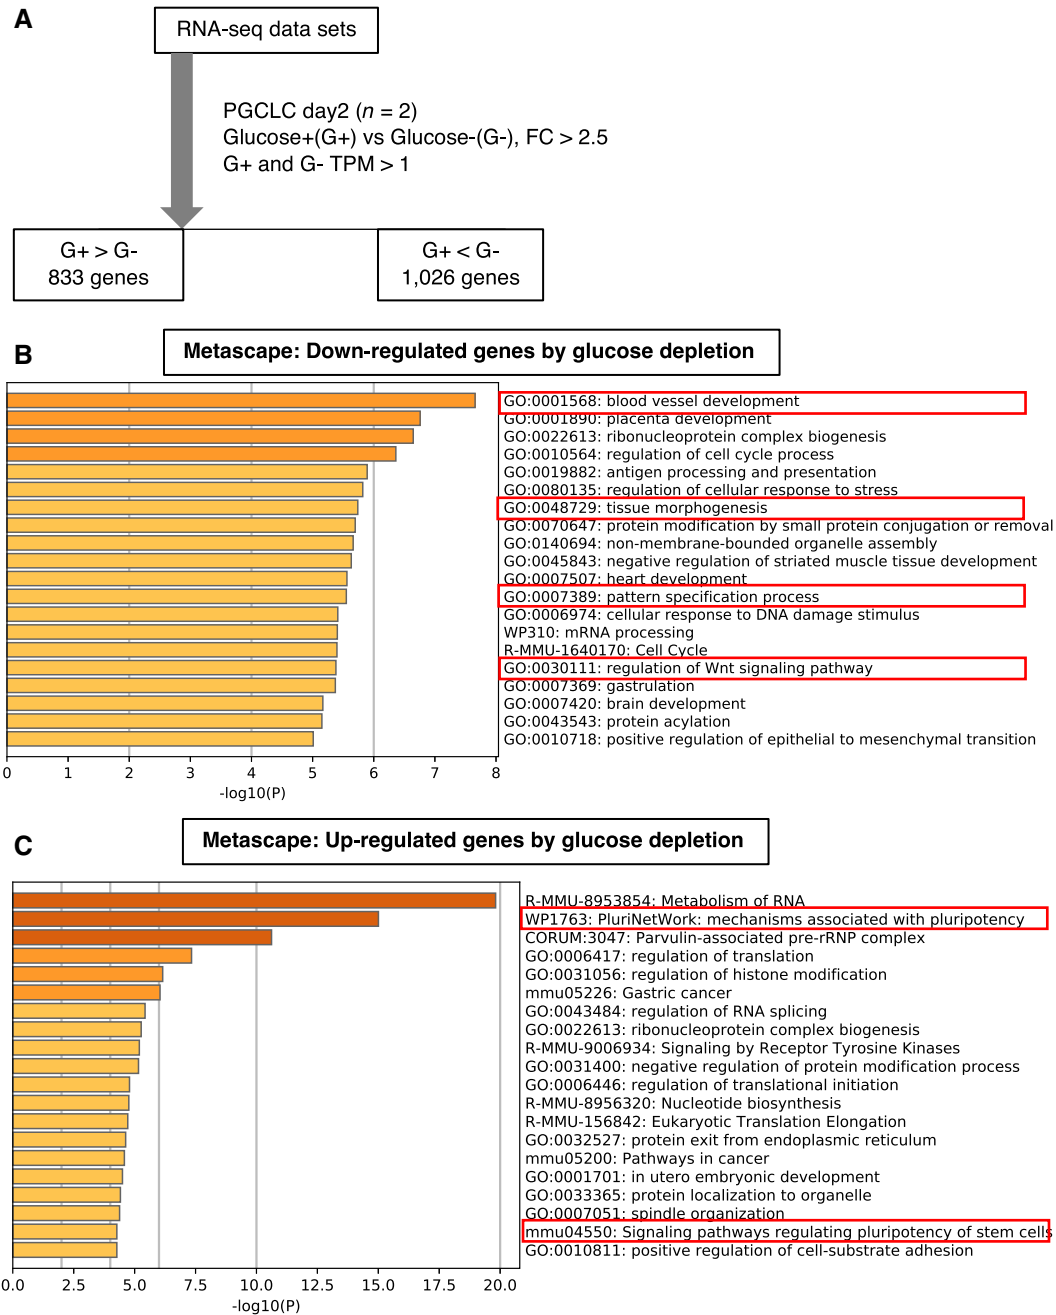

**Figure EV1. RNA-seq analysis of PGCLC-containing aggregates cultured with or without glucose.**

- A A scheme of RNA-seq analysis of the PGCLC-containing aggregates at day 2 cultured with and without glucose.  
B, C Functional annotation analysis of differentially expressed genes (DEGs). Metascape analysis of down- (B) and up-regulated (C) genes by glucose depletion. Focused terms are highlighted by red.

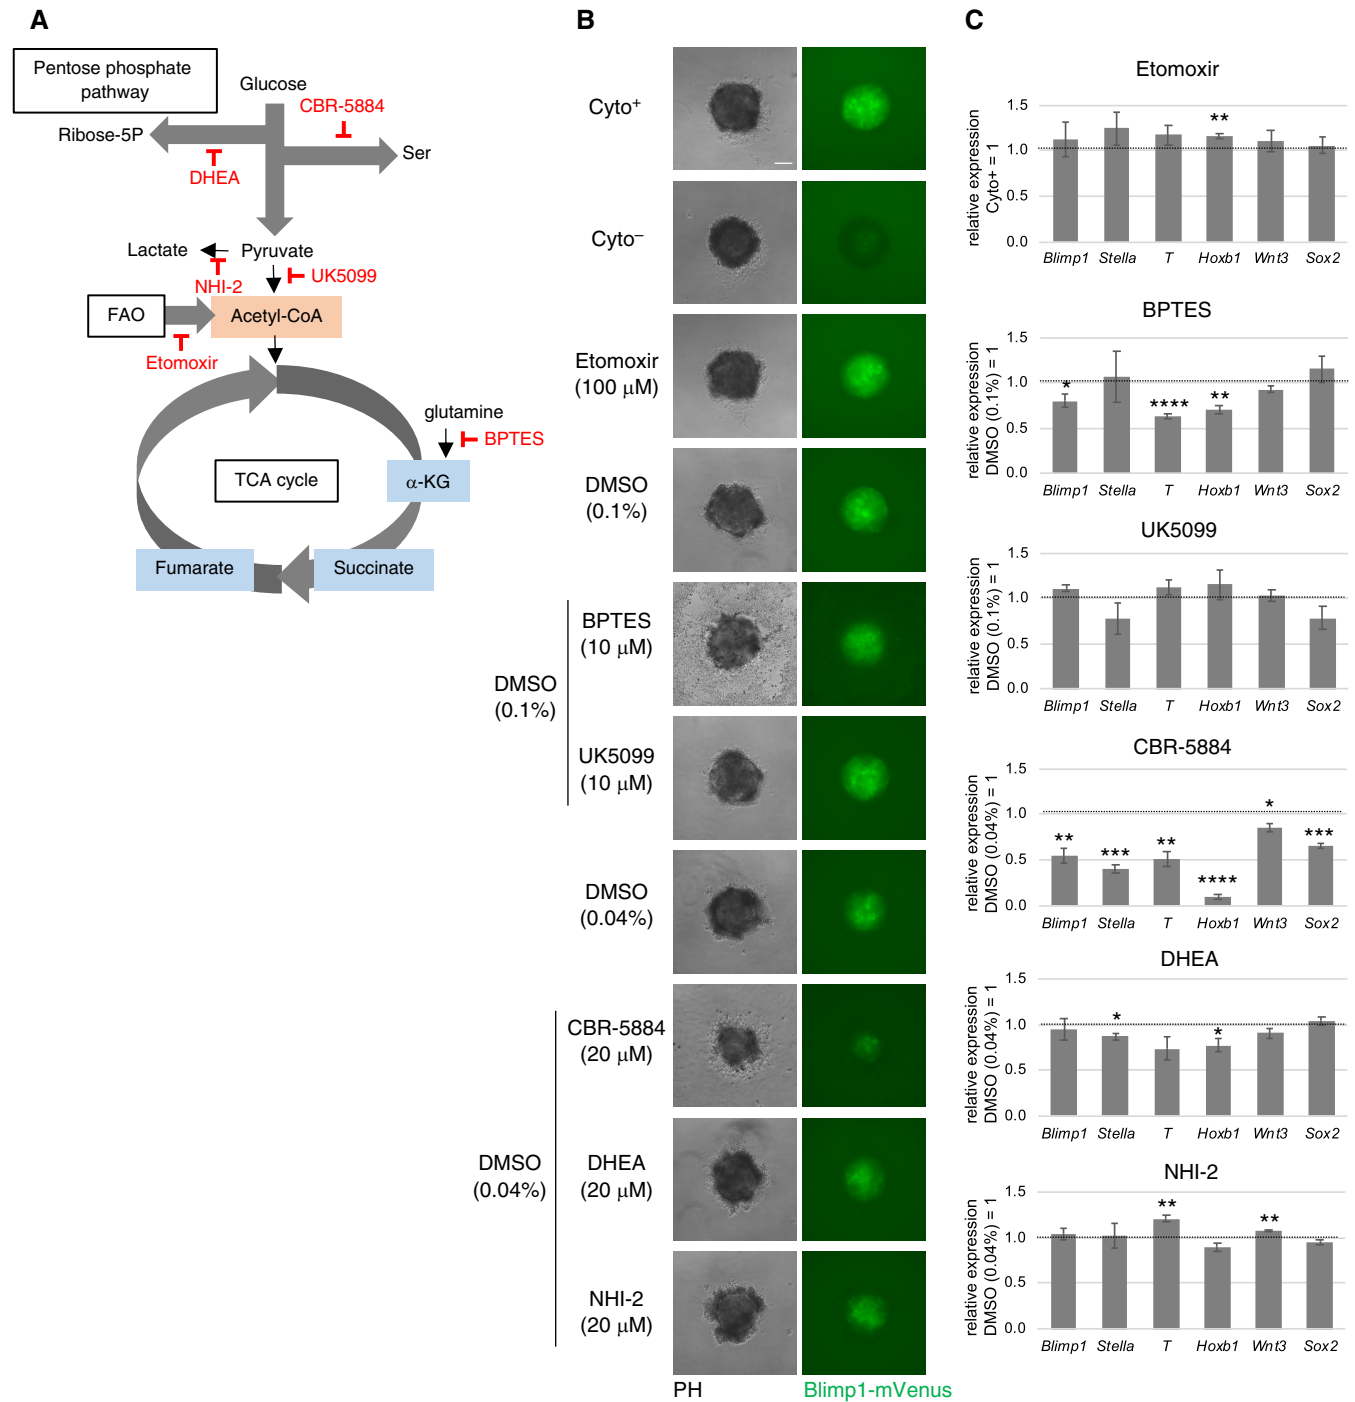

**Figure EV2. The effects of inhibition of glycolysis-related metabolic pathways during PGCLC induction.**

A A schematic representation of glycolysis-related metabolic pathways. Inhibitors used in this study are highlighted by red.  
 B, C The effects of various inhibitors for glycolysis-related pathways on BV fluorescence (B) and gene expression (C) in the PGCLC-containing aggregates at Day 2. Scale bar: 100  $\mu$ m. Values are plotted as mean  $\pm$  SE of three independent experiments. \* $P$  < 0.05, \*\* $P$  < 0.01, \*\*\* $P$  < 0.001 (Student's  $t$ -test).

**Figure EV3. Gene expression changes in PGCLC-containing aggregates with OGT inhibition by OSMI-1 or siRNA.**

- A A scheme of the RNA-seq analysis.
- B, C Functional annotation analysis of DEGs. Metascape analysis of down-regulated (B) and up-regulated (C) genes by OGT inhibition. Focused terms are highlighted by red.
- D, E Venn diagram showing the overlap between genes down- (D) or up-regulated (E) by glucose depletion and those down- or up-regulated, by OSMI-1, respectively (left). Metascape analysis of the overlapped genes (right). Focused terms are highlighted by red.
- F, G The effect of *Ogt* knockdown using siRNAs (siOgt3 and 5) on BV fluorescence (F), and gene expression (G) in the PGCLC-containing aggregates at day 2. AS: AllStars negative control siRNA.
- H *Ogt* knockdown efficiency and influence on *Oga* expression in the aggregates at day 1.

Data information: Values are plotted as mean  $\pm$  SE of three biological replicates (three technical replicates for each biological replicate sample in G and H). \* $P < 0.05$ , \*\* $P < 0.01$ , \*\*\* $P < 0.001$ , \*\*\*\* $P < 0.0001$  (Student's *t*-test).  $P < 0.1$  is also indicated by actual values to show difference tendency. Scale bar: 100  $\mu\text{m}$  (F).

Source data are available online for this figure.

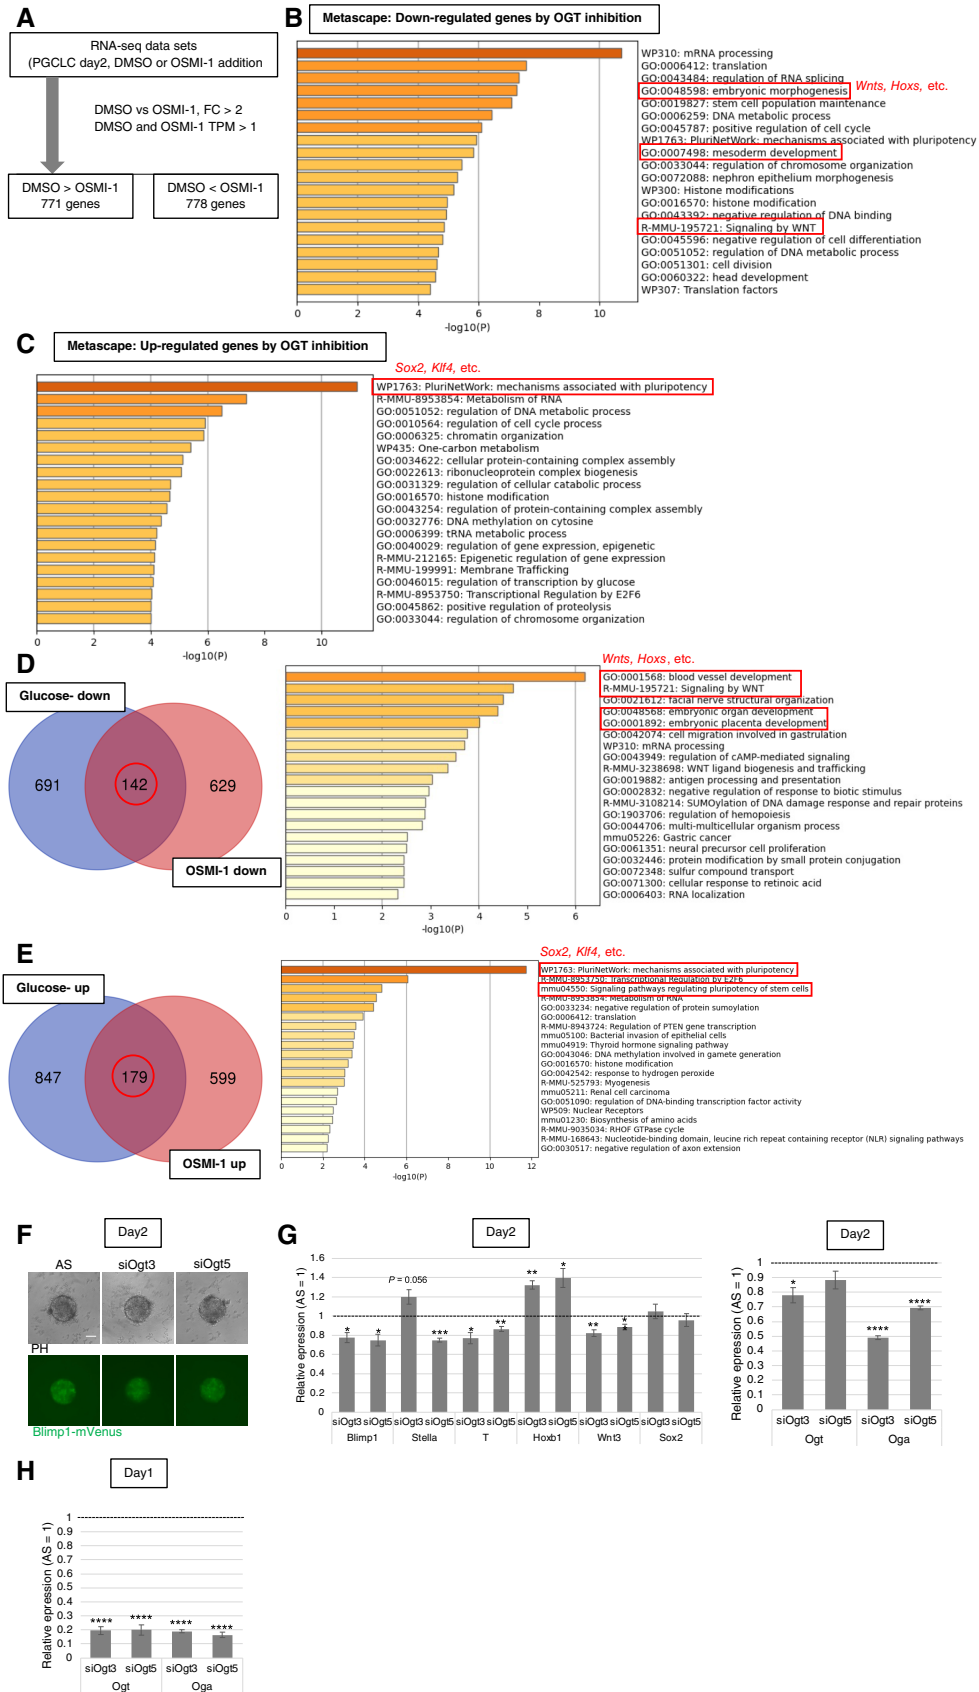

Figure EV3.

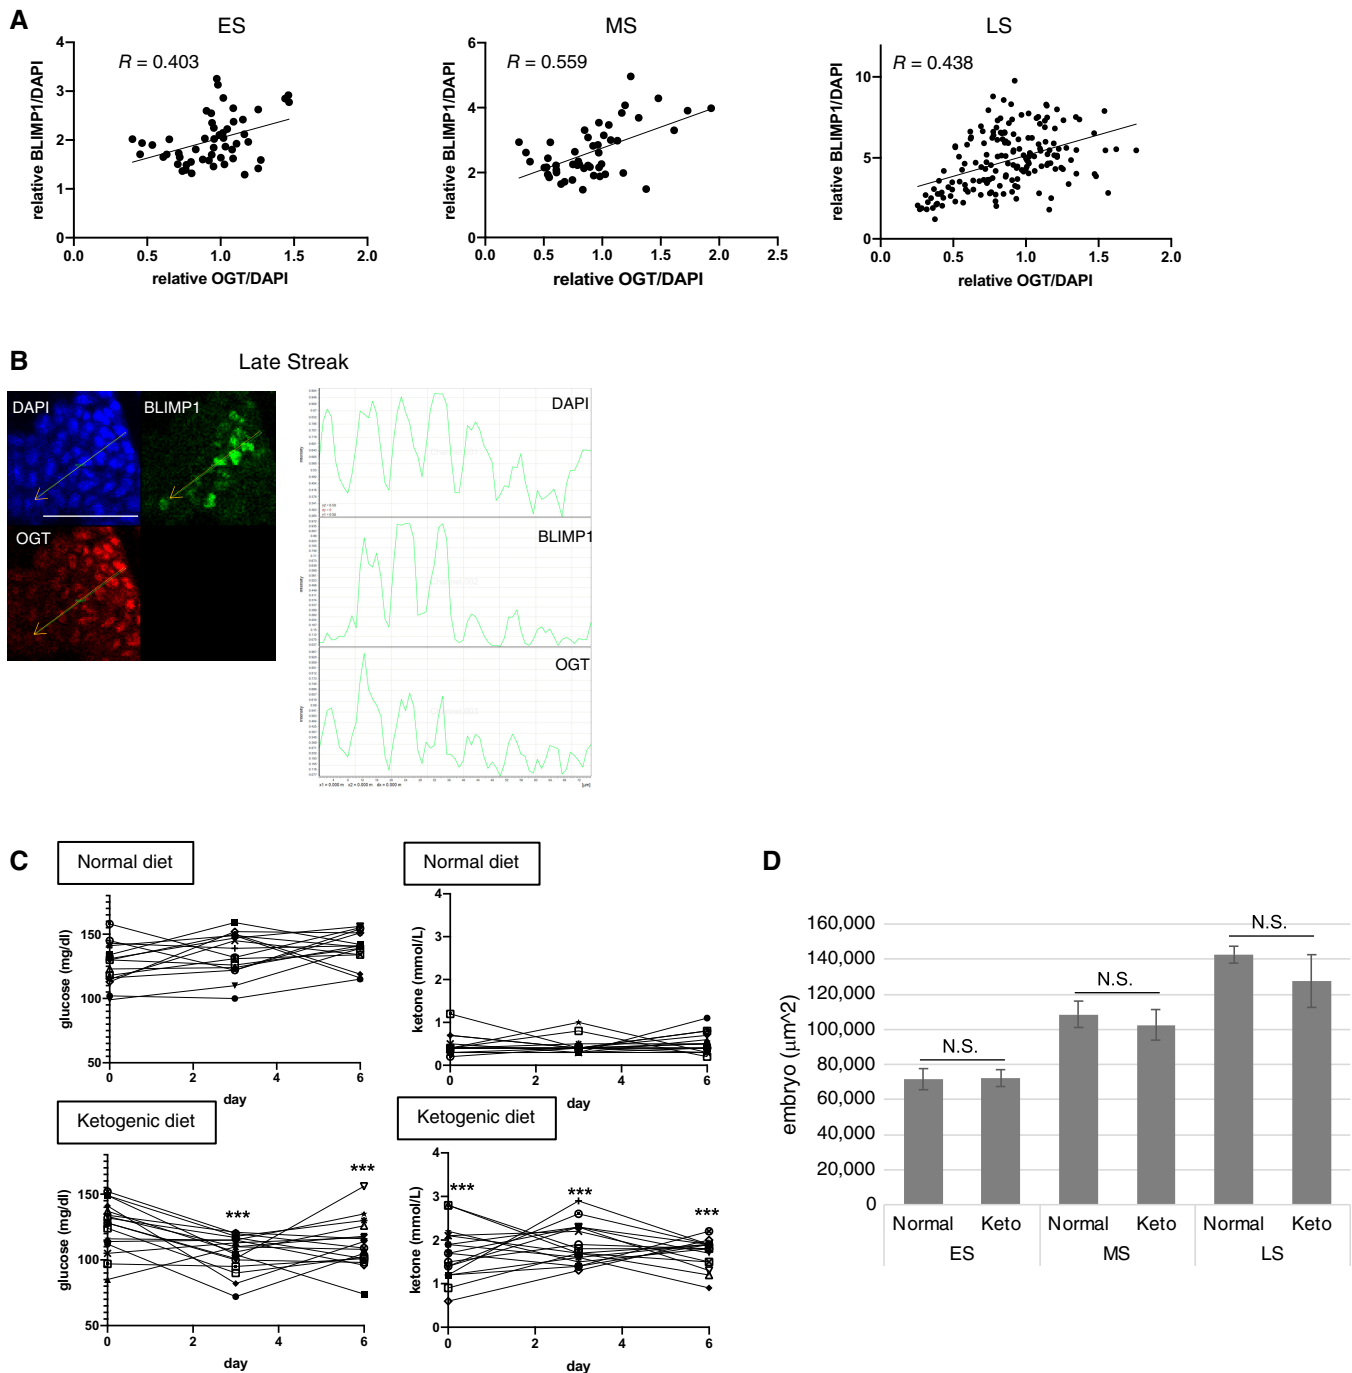

**Figure EV4. Characterization of *Ogt*-conditional knockout mice and ketogenic mice.**

- A, B Correlation between DAPI-normalized BLIMP1 and OGT signal intensity in regions existing PGCs in the embryos at early to late streak stages ( $n = 3$  each). Plotted fluorescent intensity of BLIMP1 and OGT (A), and line-scan histograms of the regions (B). The orange dotted lines shown in (B) for the line-scan. Scale bar: 75  $\mu\text{m}$ .
- C Blood glucose and BHB levels in the pregnant mice fed with normal and ketogenic diets. Measurement of blood glucose (left) and BHB (right) levels in the pregnant mice fed with normal (top) and ketogenic (bottom) diets on days 0, 3, and 6 after mating. Each line shows individual pregnant mice. normal,  $n = 15$ ; ketogenic,  $n = 17$ . Significance of differences between normal and ketogenic diets were estimated by Student's  $t$ -test. \*\*\* $P < 0.001$ .
- D The size of embryos used for immunostaining, calculated by the area of DAPI-stained images of the largest part of embryos. Values are plotted as mean  $\pm$  SE. ES (normal,  $n = 9$ ; ketogenic,  $n = 7$ ), MS (normal,  $n = 6$ ; ketogenic,  $n = 6$ ), LS (normal,  $n = 6$ ; ketogenic,  $n = 5$ ). N.S.: not significant (Student's  $t$ -test).

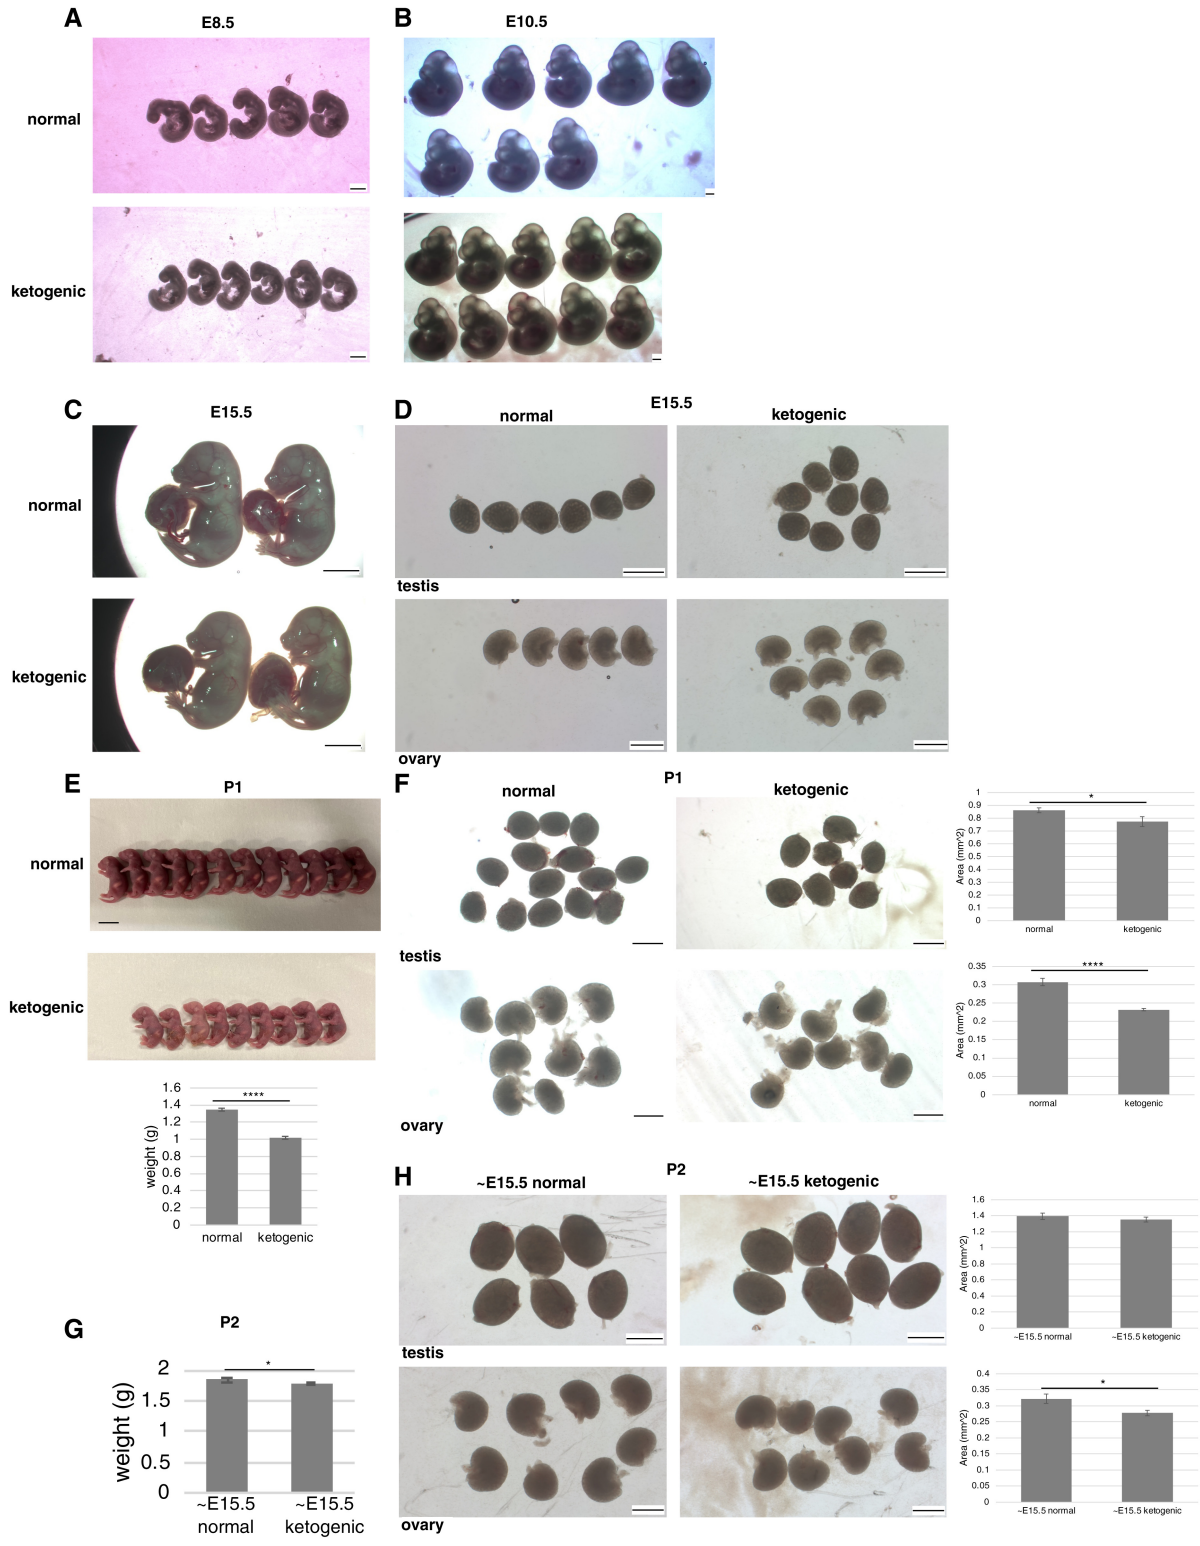

Figure EV5.

**Figure EV5. Embryos and newborn pups from mothers fed a normal or ketogenic diet.**

A–C E8.5 (A), E10.5 (B), and E15.5 (C) embryos from mothers fed a normal or ketogenic diet.

D Gonads in E15.5 embryos from mothers fed a normal or ketogenic diet.

E P1 pups from mothers fed a normal or ketogenic diet. Weight was measured (normal,  $n = 25$ ; ketogenic,  $n = 21$ ).

F Gonads in P1 pups, testes (normal,  $n = 14$ ; ketogenic,  $n = 8$ ), ovaries (normal,  $n = 9$ ; ketogenic,  $n = 8$ ). Gonad size was measured as the area value of each gonad quantified in Image J.

G Weight of P2 pups from mothers fed a normal or ketogenic diet until E15.5 and normal diet afterwards (normal,  $n = 12$ ; ketogenic,  $n = 13$ ).

H Gonads in P2 pups after switching to a normal diet at E15.5, testes (normal,  $n = 6$ ; ketogenic,  $n = 8$ ), ovaries (normal,  $n = 8$ ; ketogenic,  $n = 8$ ). Gonad size was measured as the area value of each gonad quantified in ImageJ.

Data information: Values are plotted as mean  $\pm$  SE. \* $P < 0.05$ , \*\*\*\* $P < 0.0001$  (Student's  $t$ -test). Scale bar: 500  $\mu\text{m}$  (A, B, ovaries in D, F, and H), 5 mm (C), 1 mm (testes in D, F, and H), 1 cm (E).
